# Supplementary material for: Predictability of Nonremitting Depression After First 2 Weeks of Antidepressant Treatment: A VAST-D Trial Report
Source: Atypon-hosted journal article supplement (doi:10.1176/appi.prcp.20190003), 2019-10-01
Supplement: appi.prcp.20190003.ds001.pdf [file appi.prcp.20190003.ds001.pdf]

## Supplement A

**Location of Work:** CSP #576 was performed across 35 Veterans Affairs (VA) medical centers across the U.S., including: Atlanta VA Medical Center, Atlanta, Georgia; Bruce W. Carter VA Medical Center, Miami, Florida; Central Texas Veterans Healthcare System, Temple, Texas; Charles George VA Medical Center, Asheville, North Carolina; Cincinnati VA Medical Center, Cincinnati, Ohio; Clement J. Zablocki VA Medical Center, Milwaukee, Wisconsin; Edward Hines Jr VA Hospital, Hines, Illinois; James A Haley VA Hospital, Tampa, Florida; Kansas City VA Medical Center, Kansas City, Missouri; Long Beach VA Healthcare System, Long Beach, California; Louis A. Johnson VA Medical Center, Clarksburg, West Virginia; Louis Stokes VA Medical Center and Case Western Reserve University School of Medicine, Cleveland, Ohio; Memphis VA Medical Center, Memphis, Tennessee; Minneapolis VA Health Care System, Minneapolis, Minnesota; New Mexico VA Healthcare System, Albuquerque; Philadelphia VA Medical Center, Philadelphia, Pennsylvania; Phoenix VA Health Care System, Phoenix, Arizona; Richard L Roudebush VA Medical Center, Indianapolis, Indiana; Salem VA Medical Center, Salem, Virginia; San Francisco VA Health Care System, San Francisco, California; Southern Arizona VA Healthcare System, Tucson; Tuscaloosa VA Medical Center, Tuscaloosa, Alabama; University of California, San Diego; VA Eastern Colorado Healthcare System, Denver; VA Loma Linda Healthcare System, Loma Linda, California; VA Maryland Healthcare System, Baltimore; VA Nebraska Western Iowa Healthcare System, Omaha; VA New England Mental Illness Research, Education, and Clinical Center, VA Connecticut Healthcare System, West Haven; VA Palo Alto Healthcare System, Palo Alto, California; VA Pittsburgh Healthcare System, Pittsburgh, Pennsylvania; VA Puget Sound Health Care System, American Lake/Tacoma,

Washington; VA San Diego Healthcare System, San Diego, California; Washington DC VA Medical Center; W.G. Hefner VA Medical Center, Salisbury, North Carolina; William S. Middleton Veterans Hospital, Madison, Wisconsin.

## Supplement B

### Average Dosages (mgs/day) of Bupropion or Aripiprazole for Each Treatment Group at Various Durations of the Treatment Intervention

| Treatment Group | Drug         | Baseline | Week 1 | Week 2 | Week 4 | Week 6 | Week 12 |
|-----------------|--------------|----------|--------|--------|--------|--------|---------|
| Switch-BUP      | Bupropion    | 150      | 237    | 268    | 299    | 318    | 317     |
| Aug-BUP         | Bupropion    | 150      | 221    | 248    | 295    | 311    | 284     |
| Aug-ARI         | Aripiprazole | 2        | 3      | 5      | 7      | 8      | 8       |

Average dose: the average dose prescribed at a follow-up visit, e.g., the average dose taken for the week prior to Week 2 assessment was approximately the Week 1 dose.
